# Supplementary material for: Hydrogen-rich saline alleviates inflammation and apoptosis in myocardial I/R injury via PINK-mediated autophagy
Source: PubMed Central journal article supplement — Int J Mol Med. 2019 Jul 3;44(3):1048–62. doi: 10.3892/ijmm.2019.4264 (PMC6657957; doi:10.3892/ijmm.2019.4264), 2019-07-03

Figure S1. Validation of PINK1 silencing by siRNA. H9C2 cells were transfected with either scrambled control siRNA or PINK1-specific siRNA, prior to H/R experiments. At 24 h following reoxygenation, cells were harvested for (A) reverse transcription-quantitative PCR to detect the mRNA expression levels and (B) western blotting to detect the protein expression levels of PINK1. Values are presented as the mean  $\pm$  standard error of the mean from three independent experiments. PINK1, PTEN-induced kinase 1; siRNA, small interfering RNA; H/R, hypoxia/reoxygenation; Con, control; ns, not significant.

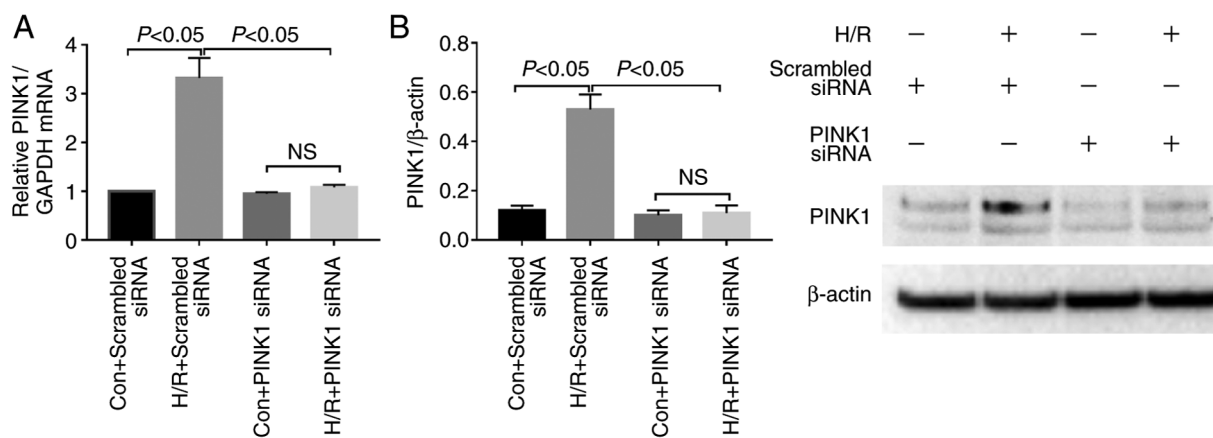

Supplement: Supplementary_Data.pdf [file Supplementary_Data.pdf]
